# Supplementary material for: A systematic assessment of structural heterogeneity and IgG/IgE-binding of ovalbumin
Source: Royal Society of Chemistry journal article supplement (doi:10.1039/d0fo02980g), 2021-01-01
Supplement: d0fo02980g1.pdf [file d0fo02980g1.pdf]

Supplementary Information for

**A systematic assessment of structural heterogeneity and IgG/IgE-binding of ovalbumin**

Wenhua Yang,  Zongcai Tu,  David Julian McClements and Igor A. Kaltashov

**Contents**

**Table S1. Information about HEA patients.** (Page S2)

**Table S2. Analysis of ovalbumin species.** (Page S3)

**Table S3. Analysis of ovomucoid species.** (Page S8)

**Figure S1. Two complementary views of OVA crystal structure** (Page S11)

**Figure S2. Influence of phosphorylation on OVA elution in anion-exchange chromatography.** (Page S12)

**Table S1. Information about HEA patients.**

| No. | Gender | Age (year) | Clinical symptoms | Other allergens    | IgE (kU L <sup>-1</sup> ) |
|-----|--------|------------|-------------------|--------------------|---------------------------|
| 1   | Male   | 5          | AS, EC            | Milk               | 15.4                      |
| 2   | Male   | 16         | AS, HI            | Peanut, Soybean    | 13.7                      |
| 3   | Female | 51         | EC, RH            | Walnut, Cottonwood | 11.5                      |
| 4   | Male   | 27         | HI, NW            | Most food allergy  | 29.8                      |
| 5   | Male   | 28         | AS, HI            | Peanut, Soybean    | 21.3                      |
| 6   | Female | 47         | HI, CW            | Most food allergy  | 64.6                      |
| 7   | Male   | 49         | AS, NW            | Codfish, Wheat     | 24.2                      |
| 8   | Male   | 33         | EC, RH            | Wheat, Shrimp      | 10.8                      |

AS, asthma; HI, hives; EC, eczema; RH, rhinitis; NW, nose wheezing; CW, chest wheezing

**Table S2. Analysis of ovalbumin species.**

| No. | ID                    | Modification |   |   |   | Glycan in N292 |        |       | Exp.       | Theor.     | $\Delta m$<br>Da | Ratio<br>% |   |
|-----|-----------------------|--------------|---|---|---|----------------|--------|-------|------------|------------|------------------|------------|---|
|     |                       | A            | P | S | O | Hex            | GlcNAc | NeuAc | Mass<br>Da | Mass<br>Da |                  |            |   |
| 1   | P1-1(1-0-0-0-8-7-0)   | 1            | 0 | 0 | 0 | 8              | 7      | 0     | 45507.6    | 45509.2    | -1.6             | 0.03       | * |
| 2   | P1-2(1-0-0-0-9-7-0)   | 1            | 0 | 0 | 0 | 9              | 7      | 0     | 45669.6    | 45671.3    | -1.7             | 0.03       | * |
| 3   | P1-3(1-0-0-0-8-8-0)   | 1            | 0 | 0 | 0 | 8              | 8      | 0     | 45711.4    | 45712.4    | -1.0             | 0.06       | * |
| 4   | P1-4(1-0-0-0-9-8-0)   | 1            | 0 | 0 | 0 | 9              | 8      | 0     | 45871.9    | 45874.3    | -2.4             | 0.08       | * |
| 5   | P1-5(1-0-0-0-8-9-0)   | 1            | 0 | 0 | 0 | 8              | 9      | 0     | 45916.8    | 45915.6    | 1.2              | 0.03       | * |
| 6   | P1-6(1-0-0-0-10-8-0)  | 1            | 0 | 0 | 0 | 10             | 8      | 0     | 46036.8    | 46036.7    | 0.1              | 0.04       | * |
| 7   | P1-7(1-0-0-0-8-10-0)  | 1            | 0 | 0 | 0 | 8              | 10     | 0     | 46118.4    | 46118.8    | -0.4             | 0.05       | * |
| 8   | P1-8(1-0-0-0-8-11-0)  | 1            | 0 | 0 | 0 | 8              | 11     | 0     | 46320.0    | 46322.0    | -2.0             | 0.03       | * |
| 9   | P1-9(1-0-0-0-9-11-0)  | 1            | 0 | 0 | 0 | 9              | 11     | 0     | 46480.8    | 46484.1    | -3.3             | 0.02       | * |
| 10  | P2-1(1-0-0-0-5-2-0)   | 1            | 0 | 0 | 0 | 5              | 2      | 0     | 44005.4    | 44006.8    | -1.4             | 0.12       |   |
| 11  | P2-2(1-0-0-0-6-2-0)   | 1            | 0 | 0 | 0 | 6              | 2      | 0     | 44167.2    | 44168.9    | -1.7             | 0.19       |   |
| 12  | P2-3(1-0-0-0-7-2-0)   | 1            | 0 | 0 | 0 | 7              | 2      | 0     | 44328.0    | 44331.1    | -3.1             | 0.05       |   |
| 13  | P2-4(1-0-0-0-5-4-0)   | 1            | 0 | 0 | 0 | 5              | 4      | 0     | 44412.0    | 44413.2    | -1.2             | 0.12       |   |
| 14  | P2-5(1-0-0-0-5-5-0)   | 1            | 0 | 0 | 0 | 5              | 5      | 0     | 44616.0    | 44616.4    | -0.4             | 0.03       | * |
| 15  | P2-6(1-0-0-0-6-5-0)   | 1            | 0 | 0 | 0 | 6              | 5      | 0     | 44778.0    | 44778.5    | -0.5             | 0.02       | * |
| 16  | P3-1(1-1-1-0-5-2-0)   | 1            | 1 | 1 | 0 | 5              | 2      | 0     | 44066.4    | 44068.8    | -2.4             | 0.11       | * |
| 17  | P3-2(1-1-1-0-6-2-0)   | 1            | 1 | 1 | 0 | 6              | 2      | 0     | 44227.2    | 44230.9    | -3.7             | 0.17       | * |
| 18  | P3-3(1-1-1-0-7-2-0)   | 1            | 1 | 1 | 0 | 7              | 2      | 0     | 44390.4    | 44393.1    | -2.7             | 0.06       | * |
| 19  | P3-4(1-1-1-0-5-4-0)   | 1            | 1 | 1 | 0 | 5              | 4      | 0     | 44473.2    | 44475.2    | -2.0             | 0.12       | * |
| 20  | P3-5(1-1-1-0-5-5-0)   | 1            | 1 | 1 | 0 | 5              | 5      | 0     | 44677.2    | 44678.4    | -1.2             | 0.04       | * |
| 21  | P3-6(1-1-0-0-8-7-0)   | 1            | 1 | 0 | 0 | 8              | 7      | 0     | 45589.2    | 45589.2    | 0.0              | 0.03       |   |
| 22  | P3-7(1-1-0-0-9-7-0)   | 1            | 1 | 0 | 0 | 9              | 7      | 0     | 45752.4    | 45751.3    | 1.1              | 0.05       | * |
| 23  | P3-8(1-1-0-0-8-8-0)   | 1            | 1 | 0 | 0 | 8              | 8      | 0     | 45793.2    | 45792.4    | 0.8              | 0.12       | * |
| 24  | P3-9(1-1-0-0-9-8-0)   | 1            | 1 | 0 | 0 | 9              | 8      | 0     | 45952.8    | 45954.5    | -1.7             | 0.18       | * |
| 25  | P3-10(1-1-0-0-8-9-0)  | 1            | 1 | 0 | 0 | 8              | 9      | 0     | 45996.0    | 45995.6    | 0.4              | 0.05       | * |
| 26  | P3-11(1-1-0-0-10-8-0) | 1            | 1 | 0 | 0 | 10             | 8      | 0     | 46113.6    | 46116.6    | -3.0             | 0.09       | * |
| 27  | P3-12(1-1-0-0-8-10-0) | 1            | 1 | 0 | 0 | 8              | 10     | 0     | 46196.4    | 46198.8    | -2.4             | 0.11       | * |
| 28  | P3-13(1-1-0-0-7-11-0) | 1            | 1 | 0 | 0 | 7              | 11     | 0     | 46236.0    | 46239.8    | -3.8             | 0.04       | * |
| 29  | P3-14(1-1-0-0-9-10-0) | 1            | 1 | 0 | 0 | 9              | 10     | 0     | 46359.8    | 46360.9    | -1.1             | 0.05       | * |
| 30  | P3-15(1-1-0-0-8-11-0) | 1            | 1 | 0 | 0 | 8              | 11     | 0     | 46400.4    | 46401.9    | -1.5             | 0.06       | * |
| 31  | P3-16(1-1-0-0-9-11-0) | 1            | 1 | 0 | 0 | 9              | 11     | 0     | 46561.2    | 46564.1    | -2.9             | 0.04       | * |
| 32  | P4-1(0-1-0-0-5-2-0)   | 0            | 1 | 0 | 0 | 5              | 2      | 0     | 44042.4    | 44044.8    | -2.4             | 0.11       | * |
| 33  | P4-2(0-1-0-0-6-2-0)   | 0            | 1 | 0 | 0 | 6              | 2      | 0     | 44204.4    | 44206.9    | -2.5             | 0.23       |   |
| 34  | P4-3(0-1-0-0-7-2-0)   | 0            | 1 | 0 | 0 | 7              | 2      | 0     | 44365.2    | 44369.0    | -3.8             | 0.06       | * |
| 35  | P4-4(0-1-0-0-5-4-0)   | 0            | 1 | 0 | 0 | 5              | 4      | 0     | 44449.2    | 44451.1    | -1.9             | 0.13       |   |

Table S2. continued

| No.       | ID                          | Modification |          |          |          | Glycan in N292 |          |          | Exp.           | Theor.         | $\Delta m$<br>Da | Ratio<br>%  |   |
|-----------|-----------------------------|--------------|----------|----------|----------|----------------|----------|----------|----------------|----------------|------------------|-------------|---|
|           |                             | A            | P        | S        | O        | Hex            | GlcNAc   | NeuAc    | Mass<br>Da     | Mass<br>Da     |                  |             |   |
| 36        | P4-5(0-1-0-0-5-5-0)         | 0            | 1        | 0        | 0        | 5              | 5        | 0        | 44653.2        | 44654.3        | -1.1             | 0.04        | * |
| 37        | P4-6(0-1-0-0-6-5-0)         | 0            | 1        | 0        | 0        | 6              | 5        | 0        | 44815.2        | 44816.5        | -1.3             | 0.02        | * |
| 38        | P5-1(1-1-0-0-4-2-0)         | 1            | 1        | 0        | 0        | 4              | 2        | 0        | 43922.4        | 43924.6        | -2.2             | 0.08        |   |
| <b>39</b> | <b>P5-2(1-1-0-0-5-2-0)</b>  | <b>1</b>     | <b>1</b> | <b>0</b> | <b>0</b> | <b>5</b>       | <b>2</b> | <b>0</b> | <b>44084.4</b> | <b>44086.8</b> | <b>-2.4</b>      | <b>2.21</b> |   |
| <b>40</b> | <b>P5-3(1-1-0-0-6-2-0)</b>  | <b>1</b>     | <b>1</b> | <b>0</b> | <b>0</b> | <b>6</b>       | <b>2</b> | <b>0</b> | <b>44247.6</b> | <b>44248.9</b> | <b>-1.3</b>      | <b>3.41</b> |   |
| 41        | P5-4(1-1-0-0-5-3-0)         | 1            | 1        | 0        | 0        | 5              | 3        | 0        | 44292.0        | 44290.0        | 2.0              | 0.36        |   |
| 42        | P5-5(1-1-0-0-4-4-0)         | 1            | 1        | 0        | 0        | 4              | 4        | 0        | 44330.4        | 44331.0        | -0.6             | 0.22        |   |
| <b>43</b> | <b>P5-6(1-1-0-0-7-2-0)</b>  | <b>1</b>     | <b>1</b> | <b>0</b> | <b>0</b> | <b>7</b>       | <b>2</b> | <b>0</b> | <b>44409.6</b> | <b>44411.1</b> | <b>-1.5</b>      | <b>0.94</b> |   |
| 44        | P5-7(1-1-0-0-5-4-0)         | 1            | 1        | 0        | 0        | 5              | 4        | 0        | 44492.4        | 44493.2        | -0.8             | 1.95        |   |
| 45        | P5-8(1-1-0-0-4-5-0)         | 1            | 1        | 0        | 0        | 4              | 5        | 0        | 44534.4        | 44534.2        | 0.2              | 0.24        |   |
| 46        | P5-9(1-1-0-0-3-6-0)         | 1            | 1        | 0        | 0        | 3              | 6        | 0        | 44575.2        | 44575.3        | -0.1             | 0.12        |   |
| 47        | P5-10(1-1-0-0-5-5-0)        | 1            | 1        | 0        | 0        | 5              | 5        | 0        | 44694.0        | 44696.4        | -2.4             | 0.44        |   |
| 48        | P5-11(1-1-0-0-4-6-0)        | 1            | 1        | 0        | 0        | 4              | 6        | 0        | 44738.4        | 44737.4        | 1.0              | 0.06        | * |
| 49        | P5-12(1-1-0-0-6-5-0)        | 1            | 1        | 0        | 0        | 6              | 5        | 0        | 44857.2        | 44858.5        | -1.3             | 0.20        | * |
| 50        | P5-13(1-1-0-0-5-6-0)        | 1            | 1        | 0        | 0        | 5              | 6        | 0        | 44901.6        | 44899.6        | 2.0              | 0.02        | * |
| 51        | P5-14(1-1-0-0-7-5-0)        | 1            | 1        | 0        | 0        | 7              | 5        | 0        | 45018.0        | 45020.6        | -2.6             | 0.01        | * |
| 52        | P6-1(1-1-0-0-8-7-0)         | 1            | 1        | 0        | 0        | 8              | 7        | 0        | 45586.8        | 45589.2        | -2.4             | 0.01        |   |
| 53        | P6-2(1-1-0-0-9-7-0)         | 1            | 1        | 0        | 0        | 9              | 7        | 0        | 45747.6        | 45751.3        | -3.7             | 0.02        | * |
| 54        | P6-3(1-1-0-0-8-8-0)         | 1            | 1        | 0        | 0        | 8              | 8        | 0        | 45789.6        | 45792.4        | -2.8             | 0.06        | * |
| <b>55</b> | <b>P6-4(1-1-0-0-9-8-0)</b>  | <b>1</b>     | <b>1</b> | <b>0</b> | <b>0</b> | <b>9</b>       | <b>8</b> | <b>0</b> | <b>45952.8</b> | <b>45954.5</b> | <b>-1.7</b>      | <b>0.15</b> | * |
| 56        | P6-5(1-1-0-0-8-9-0)         | 1            | 1        | 0        | 0        | 8              | 9        | 0        | 45996.0        | 45995.6        | 0.4              | 0.03        | * |
| <b>57</b> | <b>P6-6(1-1-0-0-10-8-0)</b> | <b>1</b>     | <b>1</b> | <b>0</b> | <b>0</b> | <b>10</b>      | <b>8</b> | <b>0</b> | <b>46113.6</b> | <b>46116.6</b> | <b>-3.0</b>      | <b>0.06</b> | * |
| 58        | P6-7(1-1-0-0-8-10-0)        | 1            | 1        | 0        | 0        | 8              | 10       | 0        | 46196.4        | 46198.8        | -2.4             | 0.06        | * |
| 59        | P6-8(1-1-0-0-7-11-0)        | 1            | 1        | 0        | 0        | 7              | 11       | 0        | 46239.6        | 46239.8        | -0.2             | 0.02        | * |
| 60        | P6-9(1-1-0-0-9-10-0)        | 1            | 1        | 0        | 0        | 9              | 10       | 0        | 46359.6        | 46360.9        | -1.3             | 0.03        | * |
| 61        | P6-10(1-1-0-0-8-11-0)       | 1            | 1        | 0        | 0        | 8              | 11       | 0        | 46400.4        | 46401.9        | -1.5             | 0.03        | * |
| 62        | P6-11(1-1-0-0-9-11-0)       | 1            | 1        | 0        | 0        | 9              | 11       | 0        | 46562.4        | 46564.1        | -1.7             | 0.02        |   |
| <b>63</b> | <b>P7-1(1-1-0-0-5-2-0)</b>  | <b>1</b>     | <b>1</b> | <b>0</b> | <b>0</b> | <b>5</b>       | <b>2</b> | <b>0</b> | <b>44084.4</b> | <b>44086.8</b> | <b>-2.4</b>      | <b>0.59</b> |   |
| <b>64</b> | <b>P7-2(1-1-0-0-6-2-0)</b>  | <b>1</b>     | <b>1</b> | <b>0</b> | <b>0</b> | <b>6</b>       | <b>2</b> | <b>0</b> | <b>44247.6</b> | <b>44248.9</b> | <b>-1.3</b>      | <b>1.10</b> |   |
| 65        | P7-3(1-1-0-0-5-3-0)         | 1            | 1        | 0        | 0        | 5              | 3        | 0        | 44292.0        | 44290.0        | 2.0              | 0.16        |   |
| 66        | P7-4(1-1-0-0-4-4-0)         | 1            | 1        | 0        | 0        | 4              | 4        | 0        | 44330.4        | 44331.0        | -0.6             | 0.09        |   |
| <b>67</b> | <b>P7-5(1-1-0-0-7-2-0)</b>  | <b>1</b>     | <b>1</b> | <b>0</b> | <b>0</b> | <b>7</b>       | <b>2</b> | <b>0</b> | <b>44409.1</b> | <b>44411.1</b> | <b>-2.0</b>      | <b>0.36</b> |   |
| 68        | P7-6(1-1-0-0-5-4-0)         | 1            | 1        | 0        | 0        | 5              | 4        | 0        | 44492.4        | 44493.2        | -0.8             | 0.58        |   |
| 69        | P7-7(1-1-0-0-4-5-0)         | 1            | 1        | 0        | 0        | 4              | 5        | 0        | 44534.4        | 44534.2        | 0.2              | 0.13        |   |
| 70        | P7-8(1-1-0-0-3-6-0)         | 1            | 1        | 0        | 0        | 3              | 6        | 0        | 44575.2        | 44575.3        | -0.1             | 0.07        |   |

Table S2. continued

| No. | ID                    | Modification |   |   |   | Glycan in N292 |        |       | Exp.       | Theor.     | $\Delta m$<br>Da | Ratio<br>% |   |
|-----|-----------------------|--------------|---|---|---|----------------|--------|-------|------------|------------|------------------|------------|---|
|     |                       | A            | P | S | O | Hex            | GlcNAc | NeuAc | Mass<br>Da | Mass<br>Da |                  |            |   |
| 71  | P7-9(1-1-0-0-5-5-0)   | 1            | 1 | 0 | 0 | 5              | 5      | 0     | 44695.2    | 44696.4    | -1.2             | 0.15       |   |
| 72  | P7-10(1-1-0-0-4-6-0)  | 1            | 1 | 0 | 0 | 4              | 6      | 0     | 44738.4    | 44737.4    | 1.0              | 0.03       | * |
| 73  | P7-11(1-1-0-0-6-5-0)  | 1            | 1 | 0 | 0 | 6              | 5      | 0     | 44857.2    | 44858.5    | -1.3             | 0.06       | * |
| 74  | P7-12(1-1-0-0-3-2-1)  | 1            | 1 | 0 | 0 | 3              | 2      | 1     | 44056.8    | 44053.8    | 3.0              | 0.12       | * |
| 75  | P7-13(1-1-0-0-4-2-1)  | 1            | 1 | 0 | 0 | 4              | 2      | 1     | 44218.8    | 44215.9    | 2.9              | 0.23       | * |
| 76  | P7-14(1-1-0-0-5-2-1)  | 1            | 1 | 0 | 0 | 5              | 2      | 1     | 44380.8    | 44378.0    | 2.8              | 0.09       | * |
| 77  | P7-15(1-1-0-0-3-4-1)  | 1            | 1 | 0 | 0 | 3              | 4      | 1     | 44461.2    | 44460.1    | 1.1              | 0.16       | * |
| 78  | P7-16(1-1-0-0-5-5-1)  | 1            | 1 | 0 | 0 | 5              | 5      | 1     | 44985.6    | 44987.6    | -2.0             | 0.04       | * |
| 79  | P7-17(1-1-0-0-4-6-1)  | 1            | 1 | 0 | 0 | 4              | 6      | 1     | 45028.8    | 45028.7    | 0.1              | 0.02       | * |
| 80  | P7-18(1-1-0-0-6-5-1)  | 1            | 1 | 0 | 0 | 6              | 5      | 1     | 45147.6    | 45149.8    | -2.2             | 0.03       | * |
| 81  | P8-1(1-2-1-0-5-2-0)   | 1            | 2 | 1 | 0 | 5              | 2      | 0     | 44146.8    | 44148.8    | -2.0             | 0.41       |   |
| 82  | P8-2(1-2-1-0-6-2-0)   | 1            | 2 | 1 | 0 | 6              | 2      | 0     | 44308.8    | 44310.9    | -2.1             | 0.90       |   |
| 83  | P8-3(1-2-1-0-7-2-0)   | 1            | 2 | 1 | 0 | 7              | 2      | 0     | 44470.8    | 44473.0    | -2.2             | 0.31       | * |
| 84  | P8-4(1-2-1-0-5-4-0)   | 1            | 2 | 1 | 0 | 5              | 4      | 0     | 44552.4    | 44555.2    | -2.8             | 0.48       |   |
| 85  | P8-5(1-2-1-0-5-5-0)   | 1            | 2 | 1 | 0 | 5              | 5      | 0     | 44756.4    | 44758.3    | -1.9             | 0.16       |   |
| 86  | P8-6(1-2-1-0-6-5-0)   | 1            | 2 | 1 | 0 | 6              | 5      | 0     | 44918.4    | 44920.5    | -2.1             | 0.08       | * |
| 87  | P8-7(1-2-0-0-8-7-0)   | 1            | 2 | 0 | 0 | 8              | 7      | 0     | 45668.4    | 45669.2    | -0.8             | 0.08       |   |
| 88  | P8-8(1-2-0-0-9-7-0)   | 1            | 2 | 0 | 0 | 9              | 7      | 0     | 45828.0    | 45831.3    | -3.3             | 0.16       |   |
| 89  | P8-9(1-2-0-0-8-8-0)   | 1            | 2 | 0 | 0 | 8              | 8      | 0     | 45870.0    | 45872.3    | -2.3             | 0.31       |   |
| 90  | P8-10(1-2-0-0-9-8-0)  | 1            | 2 | 0 | 0 | 9              | 8      | 0     | 46032.0    | 46034.5    | -2.5             | 0.57       | * |
| 91  | P8-11(1-2-0-0-8-9-0)  | 1            | 2 | 0 | 0 | 8              | 9      | 0     | 46076.4    | 46075.5    | 0.9              | 0.14       | * |
| 92  | P8-12(1-2-0-0-10-8-0) | 1            | 2 | 0 | 0 | 10             | 8      | 0     | 46195.2    | 46196.6    | -1.4             | 0.23       | * |
| 93  | P8-13(1-2-0-0-8-10-0) | 1            | 2 | 0 | 0 | 8              | 10     | 0     | 46276.8    | 46278.7    | -1.9             | 0.27       | * |
| 94  | P8-14(1-2-0-0-7-11-0) | 1            | 2 | 0 | 0 | 7              | 11     | 0     | 46320.0    | 46319.8    | 0.2              | 0.09       | * |
| 95  | P8-15(1-2-0-0-9-10-0) | 1            | 2 | 0 | 0 | 9              | 10     | 0     | 46437.6    | 46440.9    | -3.3             | 0.09       | * |
| 96  | P8-16(1-2-0-0-8-11-0) | 1            | 2 | 0 | 0 | 8              | 11     | 0     | 46479.6    | 46481.9    | -2.3             | 0.14       | * |
| 97  | P8-17(1-2-0-0-7-12-0) | 1            | 2 | 0 | 0 | 7              | 12     | 0     | 46524.0    | 46523.0    | 1.0              | 0.03       | * |
| 98  | P8-18(1-2-0-0-9-11-0) | 1            | 2 | 0 | 0 | 9              | 11     | 0     | 46642.8    | 46644.1    | -1.3             | 0.07       | * |
| 99  | P9-1(1-2-0-0-4-2-0)   | 1            | 2 | 0 | 0 | 4              | 2      | 0     | 44002.8    | 44004.6    | -1.8             | 0.47       |   |
| 100 | P9-2(0-2-0-0-5-2-0)   | 0            | 2 | 0 | 0 | 5              | 2      | 0     | 44122.4    | 44124.7    | -2.3             | 0.50       |   |
| 101 | P9-3(1-2-0-0-5-2-0)   | 1            | 2 | 0 | 0 | 5              | 2      | 0     | 44164.8    | 44166.8    | -2.0             | 13.91      |   |
| 102 | P9-4(0-2-0-0-6-2-0)   | 0            | 2 | 0 | 0 | 6              | 2      | 0     | 44284.8    | 44286.9    | -2.1             | 0.84       |   |
| 103 | P9-5(1-2-0-0-6-2-0)   | 1            | 2 | 0 | 0 | 6              | 2      | 0     | 44327.3    | 44328.9    | -1.6             | 24.96      |   |
| 104 | P9-6(1-2-0-0-7-2-0)   | 1            | 2 | 0 | 0 | 7              | 2      | 0     | 44488.8    | 44491.0    | -2.2             | 6.50       |   |
| 105 | P9-7(0-2-0-0-5-4-0)   | 0            | 2 | 0 | 0 | 5              | 4      | 0     | 44529.6    | 44531.1    | -1.5             | 0.86       |   |

Table S2. continued

| No. | ID                           | Modification |          |          |          | Glycan in N292 |          |          | Exp.           | Theor.         | $\Delta m$<br>Da | Ratio<br>%    |
|-----|------------------------------|--------------|----------|----------|----------|----------------|----------|----------|----------------|----------------|------------------|---------------|
|     |                              | A            | P        | S        | O        | Hex            | GlcNAc   | NeuAc    | Mass<br>Da     | Mass<br>Da     |                  |               |
| 106 | P9-8(1-2-0-0-5-4-0)          | 1            | 2        | 0        | 0        | 5              | 4        | 0        | 44571.6        | 44573.2        | -1.6             | 12.29         |
| 107 | <b>P9-9(1-2-0-0-4-5-0)</b>   | <b>1</b>     | <b>2</b> | <b>0</b> | <b>0</b> | <b>4</b>       | <b>5</b> | <b>0</b> | <b>44613.6</b> | <b>44614.2</b> | <b>-0.6</b>      | <b>1.64</b>   |
| 108 | P9-10(1-2-0-0-3-6-0)         | 1            | 2        | 0        | 0        | 3              | 6        | 0        | 44653.2        | 44655.3        | -2.1             | 0.68          |
| 109 | P9-11(1-2-0-0-6-4-0)         | 1            | 2        | 0        | 0        | 6              | 4        | 0        | 44732.4        | 44735.3        | -2.9             | 1.09          |
| 110 | <b>P9-12(1-2-0-0-5-5-0)</b>  | <b>1</b>     | <b>2</b> | <b>0</b> | <b>0</b> | <b>5</b>       | <b>5</b> | <b>0</b> | <b>44774.4</b> | <b>44776.3</b> | <b>-1.9</b>      | <b>2.69</b>   |
| 111 | <b>P9-13(1-2-0-0-4-6-0)</b>  | <b>1</b>     | <b>2</b> | <b>0</b> | <b>0</b> | <b>4</b>       | <b>6</b> | <b>0</b> | <b>44818.8</b> | <b>44817.4</b> | <b>1.4</b>       | <b>0.37</b> * |
| 112 | <b>P9-14(1-2-0-0-6-5-0)</b>  | <b>1</b>     | <b>2</b> | <b>0</b> | <b>0</b> | <b>6</b>       | <b>5</b> | <b>0</b> | <b>44936.4</b> | <b>44938.5</b> | <b>-2.1</b>      | <b>1.19</b>   |
| 113 | P9-15(1-2-0-0-7-5-0)         | 1            | 2        | 0        | 0        | 7              | 5        | 0        | 45099.1        | 45100.6        | -1.5             | 0.10          |
| 114 | <b>P10-1(1-2-0-0-0-0-0)</b>  | <b>1</b>     | <b>2</b> | <b>0</b> | <b>0</b> | <b>0</b>       | <b>0</b> | <b>0</b> | <b>42948.0</b> | <b>42949.7</b> | <b>-1.7</b>      | <b>0.22</b> * |
| 115 | <b>P10-2(1-2-0-0-2-4-1)</b>  | <b>1</b>     | <b>2</b> | <b>0</b> | <b>0</b> | <b>2</b>       | <b>4</b> | <b>1</b> | <b>44374.8</b> | <b>44378.0</b> | <b>-3.2</b>      | <b>0.08</b> * |
| 116 | P10-2(1-2-0-0-5-2-1)         | 1            | 2        | 0        | 0        | 5              | 2        | 1        | 44457.6        | 44458.0        | -0.4             | 0.16          |
| 117 | P10-3(1-2-0-0-6-2-1)         | 1            | 2        | 0        | 0        | 6              | 2        | 1        | 44617.2        | 44620.2        | -3.0             | 0.38          |
| 118 | P10-4(1-2-0-0-5-3-1)         | 1            | 2        | 0        | 0        | 5              | 3        | 1        | 44658.0        | 44661.2        | -3.2             | 0.11          |
| 119 | P10-5(1-2-0-0-6-3-1)         | 1            | 2        | 0        | 0        | 6              | 3        | 1        | 44822.4        | 44823.4        | -1.0             | 0.10          |
| 120 | <b>P10-6(1-2-0-0-5-5-1)</b>  | <b>1</b>     | <b>2</b> | <b>0</b> | <b>0</b> | <b>5</b>       | <b>5</b> | <b>1</b> | <b>45066.0</b> | <b>45067.6</b> | <b>-1.6</b>      | <b>0.15</b>   |
| 121 | P10-7(1-2-0-0-4-6-1)         | 1            | 2        | 0        | 0        | 4              | 6        | 1        | 45108.0        | 45108.7        | -0.7             | 0.06          |
| 122 | <b>P10-8(1-2-0-0-6-5-1)</b>  | <b>1</b>     | <b>2</b> | <b>0</b> | <b>0</b> | <b>6</b>       | <b>5</b> | <b>1</b> | <b>45228.0</b> | <b>45229.7</b> | <b>-1.7</b>      | <b>0.10</b>   |
| 123 | <b>P11-1(1-2-0-0-0-0-0)</b>  | <b>1</b>     | <b>2</b> | <b>0</b> | <b>0</b> | <b>0</b>       | <b>0</b> | <b>0</b> | <b>42948.0</b> | <b>42949.7</b> | <b>-1.7</b>      | <b>0.03</b> * |
| 124 | <b>P11-2(1-2-0-0-4-2-0)</b>  | <b>1</b>     | <b>2</b> | <b>0</b> | <b>0</b> | <b>4</b>       | <b>2</b> | <b>0</b> | <b>44002.8</b> | <b>44004.6</b> | <b>-1.8</b>      | <b>0.02</b>   |
| 125 | <b>P11-3(1-2-0-0-5-2-0)</b>  | <b>1</b>     | <b>2</b> | <b>0</b> | <b>0</b> | <b>5</b>       | <b>2</b> | <b>0</b> | <b>44164.8</b> | <b>44166.8</b> | <b>-2.0</b>      | <b>0.84</b>   |
| 126 | <b>P11-4(1-2-0-0-6-2-0)</b>  | <b>1</b>     | <b>2</b> | <b>0</b> | <b>0</b> | <b>6</b>       | <b>2</b> | <b>0</b> | <b>44326.8</b> | <b>44328.9</b> | <b>-2.1</b>      | <b>1.80</b>   |
| 127 | <b>P11-5(1-2-0-0-7-2-0)</b>  | <b>1</b>     | <b>2</b> | <b>0</b> | <b>0</b> | <b>7</b>       | <b>2</b> | <b>0</b> | <b>44488.8</b> | <b>44491.0</b> | <b>-2.2</b>      | <b>0.56</b>   |
| 128 | <b>P11-6(1-2-0-0-5-4-0)</b>  | <b>1</b>     | <b>2</b> | <b>0</b> | <b>0</b> | <b>5</b>       | <b>4</b> | <b>0</b> | <b>44571.6</b> | <b>44573.2</b> | <b>-1.6</b>      | <b>0.94</b>   |
| 129 | <b>P11-7(1-2-0-0-4-5-0)</b>  | <b>1</b>     | <b>2</b> | <b>0</b> | <b>0</b> | <b>4</b>       | <b>5</b> | <b>0</b> | <b>44613.6</b> | <b>44614.2</b> | <b>-0.6</b>      | <b>0.22</b>   |
| 130 | <b>P11-8(1-2-0-0-5-5-0)</b>  | <b>1</b>     | <b>2</b> | <b>0</b> | <b>0</b> | <b>5</b>       | <b>5</b> | <b>0</b> | <b>44774.4</b> | <b>44776.3</b> | <b>-1.9</b>      | <b>0.27</b>   |
| 131 | <b>P11-9(1-2-0-0-4-6-0)</b>  | <b>1</b>     | <b>2</b> | <b>0</b> | <b>0</b> | <b>4</b>       | <b>6</b> | <b>0</b> | <b>44818.8</b> | <b>44817.4</b> | <b>1.4</b>       | <b>0.07</b> * |
| 132 | <b>P11-10(1-2-0-0-6-5-0)</b> | <b>1</b>     | <b>2</b> | <b>0</b> | <b>0</b> | <b>6</b>       | <b>5</b> | <b>0</b> | <b>44936.4</b> | <b>44938.5</b> | <b>-2.1</b>      | <b>0.10</b>   |
| 133 | P12-1(1-2-0-1-5-2-0)         | 1            | 2        | 0        | 1        | 5              | 2        | 0        | 44182.8        | 44182.8        | 0.0              | 0.60          |
| 134 | P12-2(1-2-0-1-6-2-0)         | 1            | 2        | 0        | 1        | 6              | 2        | 0        | 44344.8        | 44344.9        | -0.1             | 1.46          |
| 135 | P12-3(1-2-0-1-7-2-0)         | 1            | 2        | 0        | 1        | 7              | 2        | 0        | 44506.8        | 44507.0        | -0.2             | 0.48          |
| 136 | P12-4(1-2-0-1-5-4-0)         | 1            | 2        | 0        | 1        | 5              | 4        | 0        | 44588.4        | 44589.2        | -0.8             | 0.77          |
| 137 | P12-5(1-2-0-1-5-5-0)         | 1            | 2        | 0        | 1        | 5              | 5        | 0        | 44792.4        | 44792.3        | 0.1              | 0.23          |
| 138 | P12-6(1-2-0-1-6-5-0)         | 1            | 2        | 0        | 1        | 6              | 5        | 0        | 44953.2        | 44954.5        | -1.3             | 0.08          |

The red highlighted species (21 species with different mass, but it includes 12 pairs of isobaric species) are the MS alone. The bolded are the isobaric species (32 pairs).

A, P, S, O in the Modifications column represents acetylation, phosphorylation, succinimide formation, oxidation, respectively. Hex, GlcNAc, NeuAc refers hexose, N-acetylhexosamine, N-acetylneuraminic acid / sialic acid, respectively.

\* means the species undetected by Bones et al.

**Table S3. Analysis of ovomucoid species.**

| No. | ID             | Glycan composition |        |       | Exp.       | Theor.     | $\Delta m$<br>Da | Ratio<br>% |
|-----|----------------|--------------------|--------|-------|------------|------------|------------------|------------|
|     |                | Hex                | GlcNAc | NeuAc | Mass<br>Da | Mass<br>Da |                  |            |
| 1   | P1-1(23-14-0)  | 23                 | 14     | 0     | 26654.6    | 26654.2    | -0.4             | 0.63       |
| 2   | P1-2(22-15-0)  | 22                 | 15     | 0     | 26696.1    | 26695.2    | -0.9             | 0.62       |
| 3   | P1-3(21-16-0)  | 21                 | 16     | 0     | 26737.7    | 26736.3    | -1.4             | 0.58       |
| 4   | P1-4(20-17-0)  | 20                 | 17     | 0     | 26777.0    | 26777.3    | 0.3              | 0.51       |
| 5   | P1-5(19-18-0)  | 19                 | 18     | 0     | 26816.4    | 26818.4    | 2.0              | 0.72       |
| 6   | P1-6(18-19-0)  | 18                 | 19     | 0     | 26858.4    | 26859.4    | 1.0              | 0.98       |
| 7   | P1-7(17-20-0)  | 17                 | 20     | 0     | 26901.8    | 26900.5    | -1.3             | 0.85       |
| 8   | P1-8(19-19-0)  | 19                 | 19     | 0     | 27019.0    | 27021.6    | 2.6              | 1.06       |
| 9   | P1-9(18-20-0)  | 18                 | 20     | 0     | 27061.7    | 27062.6    | 0.9              | 1.62       |
| 10  | P1-10(17-21-0) | 17                 | 21     | 0     | 27101.9    | 27103.7    | 1.8              | 1.20       |
| 11  | P1-11(20-19-0) | 20                 | 19     | 0     | 27182.4    | 27183.7    | 1.3              | 0.90       |
| 12  | P1-12(19-20-0) | 19                 | 20     | 0     | 27223.4    | 27224.8    | 1.4              | 1.47       |
| 13  | P1-13(18-21-0) | 18                 | 21     | 0     | 27264.2    | 27265.8    | 1.6              | 2.09       |
| 14  | P1-14(17-22-0) | 17                 | 22     | 0     | 27307.9    | 27306.9    | -1.0             | 1.29       |
| 15  | P1-15(20-20-0) | 20                 | 20     | 0     | 27385.4    | 27386.9    | 1.5              | 1.13       |
| 16  | P1-16(19-21-0) | 19                 | 21     | 0     | 27426.6    | 27428.0    | 1.4              | 1.96       |
| 17  | P1-17(18-22-0) | 18                 | 22     | 0     | 27468.4    | 27469.0    | 0.6              | 2.59       |
| 18  | P1-18(17-23-0) | 17                 | 23     | 0     | 27508.7    | 27510.1    | 1.4              | 1.63       |
| 19  | P1-19(15-25-0) | 15                 | 25     | 0     | 27591.0    | 27592.2    | 1.1              | 1.48       |
| 20  | P1-20(19-22-0) | 19                 | 22     | 0     | 27629.4    | 27631.2    | 1.8              | 2.67       |
| 21  | P1-21(18-23-0) | 18                 | 23     | 0     | 27670.5    | 27672.2    | 1.7              | 2.64       |
| 22  | P1-22(17-24-0) | 17                 | 24     | 0     | 27712.5    | 27713.3    | 0.8              | 1.78       |
| 23  | P1-23(15-26-0) | 15                 | 26     | 0     | 27793.1    | 27795.4    | 2.3              | 1.67       |
| 24  | P1-24(19-23-0) | 19                 | 23     | 0     | 27834.3    | 27834.3    | 0.0              | 2.61       |
| 25  | P1-25(18-24-0) | 18                 | 24     | 0     | 27874.2    | 27875.4    | 1.2              | 3.23       |
| 26  | P1-26(17-25-0) | 17                 | 25     | 0     | 27915.6    | 27916.5    | 0.9              | 1.48       |
| 27  | P1-27(15-27-0) | 15                 | 27     | 0     | 27997.7    | 27998.6    | 0.9              | 1.68       |
| 28  | P1-28(19-24-0) | 19                 | 24     | 0     | 28037.7    | 28037.5    | -0.2             | 2.76       |
| 29  | P1-29(18-25-0) | 18                 | 25     | 0     | 28078.2    | 28078.6    | 0.4              | 2.16       |
| 30  | P1-30(17-26-0) | 17                 | 26     | 0     | 28118.4    | 28119.6    | 1.2              | 1.30       |
| 31  | P1-31(15-28-0) | 15                 | 28     | 0     | 28200.4    | 28201.7    | 1.3              | 1.76       |
| 32  | P1-32(19-25-0) | 19                 | 25     | 0     | 28238.7    | 28240.7    | 2.1              | 1.86       |
| 33  | P1-33(18-26-0) | 18                 | 26     | 0     | 28279.8    | 28281.8    | 2.0              | 1.84       |
| 34  | P1-34(17-27-0) | 17                 | 27     | 0     | 28322.4    | 28322.8    | 0.4              | 0.93       |
| 35  | P1-35(16-28-0) | 16                 | 28     | 0     | 28361.9    | 28363.9    | 2.0              | 0.87       |



**Table S3. Continued**

| No. | ID             | Glycan composition |        |       | Exp.       | Theor.     | $\Delta m$<br>Da | Ratio<br>% |
|-----|----------------|--------------------|--------|-------|------------|------------|------------------|------------|
|     |                | Hex                | GlcNAc | NeuAc | Mass<br>Da | Mass<br>Da |                  |            |
| 36  | P1-36(15-29-0) | 15                 | 29     | 0     | 28407.9    | 28404.9    | -3.0             | 1.06       |
| 37  | P1-37(19-26-0) | 19                 | 26     | 0     | 28444.0    | 28443.9    | 0.1              | 1.55       |
| 38  | P1-38(18-27-0) | 18                 | 27     | 0     | 28485.6    | 28485.0    | -0.6             | 0.93       |
| 39  | P1-39(17-28-0) | 17                 | 28     | 0     | 28527.9    | 28526.0    | -1.9             | 0.75       |
| 40  | P1-40(16-29-0) | 16                 | 29     | 0     | 28568.0    | 28567.1    | 0.9              | 0.71       |
| 41  | P1-41(15-30-0) | 15                 | 30     | 0     | 28605.9    | 28608.1    | -2.3             | 1.03       |
| 42  | P1-42(19-27-0) | 19                 | 27     | 0     | 28646.8    | 28647.1    | -0.3             | 0.77       |
| 43  | P1-43(18-28-0) | 18                 | 28     | 0     | 28686.1    | 28688.2    | -2.1             | 0.90       |
| 44  | P1-44(17-29-0) | 17                 | 29     | 0     | 28731.0    | 28729.2    | 1.8              | 0.50       |
| 45  | P1-45(16-30-0) | 16                 | 30     | 0     | 28769.0    | 28770.3    | -1.3             | 0.53       |
| 46  | P1-46(15-31-0) | 15                 | 31     | 0     | 28809.4    | 28811.3    | -1.9             | 0.52       |
| 47  | P1-47(19-28-0) | 19                 | 28     | 0     | 28848.8    | 28850.3    | -1.5             | 0.58       |
| 48  | P2-1(15-13-0)  | 15                 | 13     | 0     | 25154.8    | 25153.9    | 0.9              | 0.94       |
| 49  | P2-2(14-14-0)  | 14                 | 14     | 0     | 25192.9    | 25194.9    | -2.0             | 0.96       |
| 50  | P2-3(16-13-0)  | 16                 | 13     | 0     | 25318.7    | 25316.0    | 2.7              | 0.79       |
| 51  | P2-4(15-14-0)  | 15                 | 14     | 0     | 25355.1    | 25357.1    | -2.0             | 1.35       |
| 52  | P2-5(14-15-0)  | 14                 | 15     | 0     | 25395.9    | 25398.1    | -2.2             | 1.26       |
| 53  | P2-6(16-14-0)  | 16                 | 14     | 0     | 25518.1    | 25519.2    | -1.1             | 1.17       |
| 54  | P2-7(15-15-0)  | 15                 | 15     | 0     | 25558.7    | 25560.2    | -1.5             | 1.33       |
| 55  | P2-8(14-16-0)  | 14                 | 16     | 0     | 25598.9    | 25601.3    | -2.4             | 1.50       |
| 56  | P2-9(13-17-0)  | 13                 | 17     | 0     | 25642.8    | 25642.4    | 0.4              | 1.78       |
| 57  | P2-10(12-18-0) | 12                 | 18     | 0     | 25682.3    | 25683.4    | -1.1             | 1.45       |
| 58  | P2-11(15-16-0) | 15                 | 16     | 0     | 25765.7    | 25763.4    | 2.3              | 1.27       |
| 59  | P2-12(13-18-0) | 13                 | 18     | 0     | 25842.9    | 25845.5    | -2.6             | 1.37       |
| 60  | P2-13(12-19-0) | 12                 | 19     | 0     | 25883.4    | 25886.6    | -3.2             | 1.31       |
| 61  | P2-14(15-17-0) | 15                 | 17     | 0     | 25966.1    | 25966.6    | -0.5             | 1.22       |
| 62  | P2-15(14-18-0) | 14                 | 18     | 0     | 26007.8    | 26007.7    | 0.1              | 1.74       |
| 63  | P2-16(13-19-0) | 13                 | 19     | 0     | 26045.7    | 26048.7    | -3.0             | 1.71       |
| 64  | P2-17(12-20-0) | 12                 | 20     | 0     | 26087.2    | 26089.8    | -2.6             | 1.66       |
| 65  | P2-18(12-21-0) | 12                 | 21     | 0     | 26290.1    | 26293.0    | -2.9             | 1.06       |
| 66  | P2-19(10-23-0) | 10                 | 23     | 0     | 26373.3    | 26375.1    | -1.8             | 0.75       |
| 67  | P2-20(13-21-0) | 13                 | 21     | 0     | 26453.2    | 26455.1    | -1.9             | 0.84       |
| 68  | P2-21(12-22-0) | 12                 | 22     | 0     | 26494.7    | 26496.2    | -1.5             | 0.98       |
| 69  | P2-22(13-22-0) | 13                 | 22     | 0     | 26656.9    | 26658.3    | -1.4             | 0.70       |
| 70  | P2-23(12-23-0) | 12                 | 23     | 0     | 26697.2    | 26699.4    | -2.2             | 0.69       |

**Table S3. Continued**

| No. | ID            | Glycan composition |        |       | Exp.       | Theor.     | $\Delta m$<br>Da | Ratio<br>% |
|-----|---------------|--------------------|--------|-------|------------|------------|------------------|------------|
|     |               | Hex                | GlcNAc | NeuAc | Mass<br>Da | Mass<br>Da |                  |            |
| 71  | P3-1(11-17-1) | 11                 | 17     | 1     | 25608.2    | 25609.3    | -1.1             | 0.47       |
| 72  | P3-2(10-18-1) | 10                 | 18     | 1     | 25649.2    | 25650.4    | -1.2             | 0.56       |
| 73  | P3-3(11-18-1) | 11                 | 18     | 1     | 25811.3    | 25812.5    | -1.2             | 0.46       |
| 74  | P3-4(10-19-1) | 10                 | 19     | 1     | 25850.9    | 25853.6    | -2.7             | 0.52       |
| 75  | P3-5(9-20-1)  | 9                  | 20     | 1     | 25893.5    | 25894.6    | -1.1             | 0.55       |
| 76  | P3-6(7-22-1)  | 7                  | 22     | 1     | 25974.5    | 25976.7    | -2.2             | 0.49       |
| 77  | P3-7(6-23-1)  | 6                  | 23     | 1     | 26016.8    | 26017.8    | -1.0             | 0.59       |
| 78  | P3-8(5-24-1)  | 5                  | 24     | 1     | 26056.4    | 26058.8    | -2.4             | 0.78       |
| 79  | P3-9(8-23-1)  | 8                  | 23     | 1     | 26340.0    | 26342.1    | -2.1             | 0.63       |
| 80  | P3-10(7-24-1) | 7                  | 24     | 1     | 26380.4    | 26383.1    | -2.7             | 0.58       |
| 81  | P3-11(8-24-1) | 8                  | 24     | 1     | 26544.3    | 26545.3    | -0.9             | 0.62       |
| 82  | P3-12(9-24-1) | 9                  | 24     | 1     | 26705.7    | 26707.4    | -1.7             | 0.49       |
| 83  | P3-13(8-25-1) | 8                  | 25     | 1     | 26747.4    | 26748.4    | -1.0             | 0.60       |
| 84  | P3-14(9-25-1) | 9                  | 25     | 1     | 26908.9    | 26910.6    | -1.7             | 0.47       |

The red highlighted species (15 species) are the MS alone.

Hex, GlcNAc, NeuAc refers hexose, N-acetylhexosamine, N-acetylneuraminic acid / sialic acid, respectively.

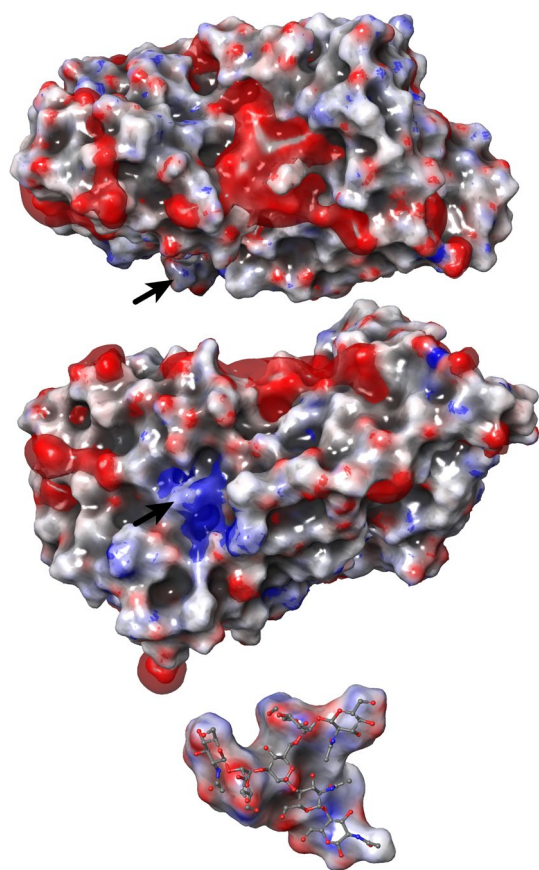

**Figure S1.** Two complementary views of OVA crystal structure (PDB id: 1OVA) showing isopotential surfaces at  $-4kT/e$  (with semi-transparent red surfaces) and location of the glycosylation site (with a black arrow). A biantennary Hex3GlcNAc4 structure is shown at the bottom as a reference.

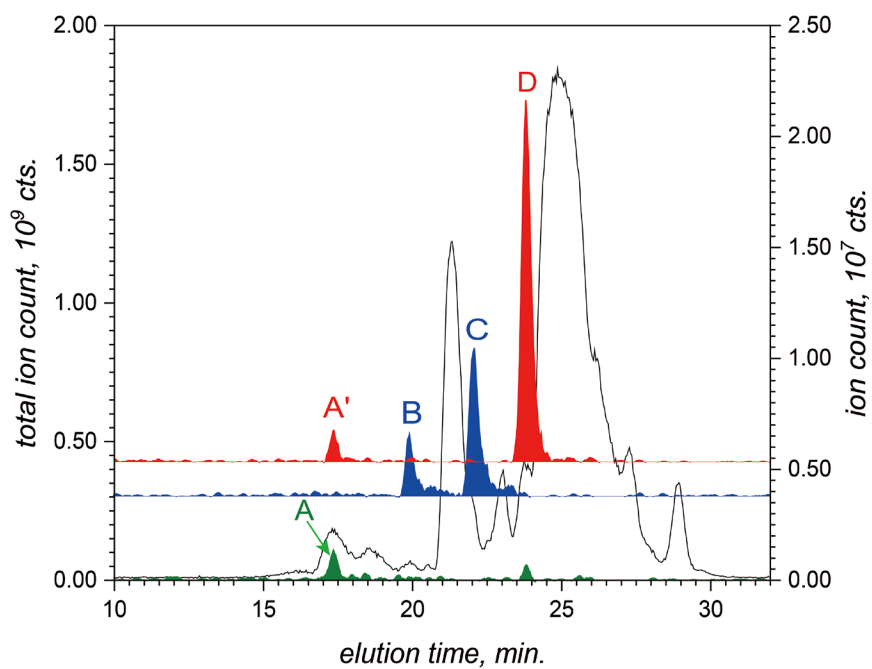

**Figure S2.** Influence of phosphorylation on OVA elution in anion-exchange chromatography. The extracted ion chromatograms for OVA glycoform Hex<sub>8</sub>GlcNAc<sub>8</sub>NeuAc<sub>0</sub> exhibiting different levels of phosphorylation (green: non-phosphorylated; blue: mono-phosphorylated; and red: bis-phosphorylated).
